# Supplementary material
Source: Springer Nature journal article supplement (https://www.springermedizin.de/resource/supplementary/12936_2008_616_MOESM2_ESM.pdf/9547834)

Std. dev.

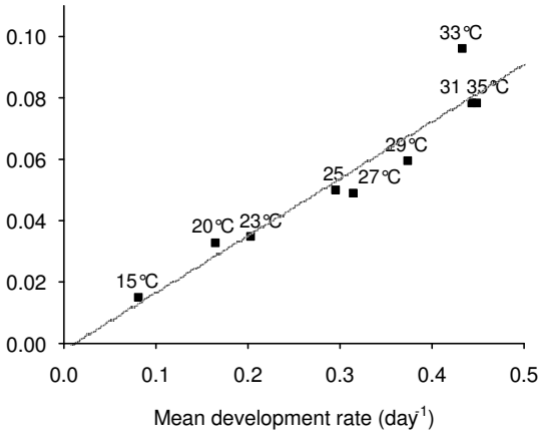

Supplement: MOESM2 [file 9547834]
